# Supplementary material for: Effect and Mechanism of LRP6 on Cardiac Myocyte Ferroptosis in Myocardial Infarction
Source: Oxid Med Cell Longev. 2021 Oct 19;2021:8963987. doi: 10.1155/2021/8963987 (PMC8548150; doi:10.1155/2021/8963987)
Supplement: Supplementary Materials — Supplementary Figure 1 The measurement of ultrasonograph in the representative mouse. Supplementary Figure 2. The detail of identification of circRNA1615 circbase database. Supplementary Figure 3. The binding sites of circRNA1615, miR-152-3p, and LRP6. [file 8963987.f1.zip]

Archive with 3 entries (3 files):
- 8963987.f1/Supplementary Figure 1.docx
- 8963987.f1/Supplementary Figure 2.docx
- 8963987.f1/Supplementary Figure 3.docx
